# Supplementary material
Source: publisher site journal article supplement (https://www.kjim.org/upload/media/kjim-2024-034-Supplementary-Table-2.pdf)
Supplement: Supplementary file 1 [file kjim-2024-034-Supplementary-Table-2.pdf]

**Supplementary Table 2. Additional criteria applied to the KOCOSS registry for data collection**

| Objective                                               | Additional criteria <sup>a)</sup>                                                                                                 |
|---------------------------------------------------------|-----------------------------------------------------------------------------------------------------------------------------------|
| Patient demographics, stratified by BEC                 | At least one BEC recorded at baseline in a stable state                                                                           |
| Patterns in BEC, stratified by clinical characteristics | At least one BEC recorded at baseline, 6-month or 12-month follow-up in a stable state                                            |
| The stability of BEC measurements over time             | At least one BEC recorded at baseline or any follow-up in a stable state<br>Multiple observations were considered where available |
| Quality of life (as evaluated by PROs)                  | Patients with data for at least one of the PROs completed at baseline                                                             |

KOCOSS, KOrlea COPD Subgroup Study; COPD, chronic obstructive pulmonary disease; BEC, blood eosinophil count; PRO, patient-reported outcome.

<sup>a)</sup>Additional eligibility criteria applied in addition to the original KOCOSS criteria for selected objectives.
